# Supplementary material for: What Factors Influence the Interest in Working in the Public Health Service in Germany? Part I of the OeGD-Studisurvey
Source: MDPI journal article supplement (doi:10.3390/ijerph191811838), 2022-09-19
Supplement: s1 [file s1]

## Herzlich Willkommen!

Wir freuen uns, dass du Dir kurz Zeit für die Umfrage nimmst!

Wir wollen herausfinden, (1) welche **Wünsche und Ansprüche** Mediziner\_innen und Gesundheitswissenschaftler\_innen an ihre zukünftige Arbeit und Ihre Arbeitgeber haben und (2) was das konkret für **Ausbildungs- und Karrierewege** im Bereich Public Health/öffentliche Gesundheit bedeutet.

Je mehr Personen teilnehmen, desto eher können wir aus den Ergebnissen ableiten, welche Weichenstellungen vorgenommen werden müssen um attraktive Jobs und Arbeitsbedingungen zu schaffen. Zum anderen verleiht uns (und dir) eine große Zahl von Antworten mehr **(politische) Einflussmöglichkeiten**, diese Wünsche und Erwartungen auch in deinem Sinne bei den Arbeitgebern durchzusetzen.

Als Dankeschön für dein Engagement verlosen wir unter allen Teilnehmenden ein Kongressticket inkl. Übernachtungskosten zum nächsten [BVÖGD-Kongress](#) in Saarbrücken (23. – 25. April 2020), ein Lenovo-Tablet (tabE10) und drei Power-Banks. Lass uns hierzu einfach deine E-Mail-Adresse am Ende der Befragung zukommen, wenn du an der Verlosung teilnehmen möchtest. Die Verlosung verläuft natürlich unabhängig von der Befragung.

Unsere Befragung ist **anonym**: Wir fragen ein paar wenige personenbezogene Daten ab (z.B. was du studierst), aber du als Individuum bist nicht mehr identifizierbar und Rückschlüsse auf die jeweilige Person sind nicht mehr möglich. Du musst dich nirgends registrieren.

**Wir wünschen dir viel Spaß bei der Umfrage!**

---

*Diese Umfrage ist eine Kooperation zwischen der Akademie für Öffentliches Gesundheitswesen (AfÖG), dem Bundesverband der Ärztinnen und Ärzte des öffentlichen Gesundheitsdienstes (BVÖGD), der Bundesvertretung der Medizinstudierenden in Deutschland e.V. (BVMD) und dem Nachwuchsnetzwerk Öffentliche Gesundheit (NÖG).*

### Anonymität und Datenschutz

Alle Angaben werden selbstverständlich anonym ausgewertet! Um dennoch Aussagen über einzelne Gruppen treffen zu können, benötigen wir ein paar Angaben zu deiner Person. Aus den Ergebnissen werden anschließend **keine Rückschlüsse** auf Einzelpersonen mehr möglich sein. Es geht uns lediglich darum herauszuarbeiten, welche Unterschiede in den beruflichen Erwartungen bestehen.

### Wie alt bist du?

Alter in Jahren

### Biologisches Geschlecht

- ☐ männlich
- ☐ weiblich
- ☐ divers

**In welchem Studiengang bist du aktuell primär immatrikuliert (bzw. im Fall von mehreren Studiengängen: Was würdest du als dein Hauptstudium beschreiben)?**

- ☐ Humanmedizin / Zahnmedizin
- ☐ Veterinärmedizin
- ☐ Politikwissenschaften
- ☐ Psychologie
- ☐ Public Health / Gesundheitswissenschaften / Gesundheitsmanagement
- ☐ Soziale Arbeit
- ☐ Soziologie
- ☐ Wirtschaftswissenschaften
- ☐ Sonstiges, und zwar:
- ☐ Ich bin derzeit in keinem Studiengang immatrikuliert

**In welchem Abschnitt deines Studiums befindest du dich?**

- ☐ Vorklinischer Teil
- ☐ Klinischer Teil
- ☐ Modellstudiengang vor dem Praktischen Jahr
- ☐ Praktisches Jahr
- ☐ Bereits abgeschlossen

**Welchen Studienabschluss wirst du aller Voraussicht nach als nächstes erreichen?**

- ☐ Promotion
- ☐ Master
- ☐ Bachelor
- ☐ Staatsexamen
- ☐ Sonstiges, und zwar:

**Welche Facharztweiterbildungen kommen für dich in Frage?**

Mehrfachantworten sind möglich

- ☐ Ich bin aktuell unentschieden
- ☐ Ich strebe aktuell keine Facharztweiterbildung an
- ☐ Innere Medizin
- ☐ Kinder- & Jugendmedizin
- ☐ Allgemeinmedizin
- ☐ Anästhesiologie
- ☐ Chirurgie / Unfallchirurgie / Orthopädie
- ☐ Frauenheilkunde und Geburtshilfe
- ☐ Psychiatrie / Psychotherapie
- ☐ Neurologie
- ☐ Öffentliches Gesundheitswesen
- ☐ Sonstige, und zwar:

**Hast du vor deinem aktuellen Studium weitere Studiengänge abgeschlossen bzw. bist du aktuell noch in einem weiteren Studiengang immatrikuliert?**

- ☐ Ja
- ☐ Nein

**Was für ein Studium hast du bereits abgeschlossen, bzw. in welchem Studiengang bist du gerade zusätzlich eingeschrieben?**

- ☐ Humanmedizin / Zahnmedizin  
☐ Veterinärmedizin  
☐ Politikwissenschaften  
☐ Psychologie  
☐ Public Health / Gesundheitswissenschaften / Gesundheitsmanagement  
☐ Soziale Arbeit  
☐ Soziologie  
☐ Wirtschaftswissenschaften  
☐ Sonstiges, und zwar

**In welchem Bereich möchtest du nach dem Studium arbeiten?**

Bitte sortiere die Tätigkeiten nach deiner persönlichen Relevanz, wobei „1“ der höchsten Relevanz und „6“ der niedrigsten Relevanz entspricht. Ziehe die einzelnen Tätigkeiten hierzu einfach per Drag&Drop auf den jeweiligen Platz.

|                                                                                      |                                                                       |   |
|--------------------------------------------------------------------------------------|-----------------------------------------------------------------------|---|
| <b>Klinische bzw. klientenbezogene Tätigkeit (z.B. als praktizierende_r Ärzt_in)</b> | <b>Public Health außerhalb des Öffentlichen Gesundheitsdienstes</b> ⓘ | 1 |
|                                                                                      | <b>Public Health innerhalb des Öffentlichen Gesundheitsdienstes</b> ⓘ | 2 |
| <b>Forschung und Wissenschaft</b> ⓘ                                                  | <b>Privatwirtschaft</b>                                               | 3 |
| <b>Sonstiges</b>                                                                     |                                                                       | 4 |
|                                                                                      |                                                                       | 5 |
|                                                                                      |                                                                       | 6 |

**An welcher Fakultät absolvierst du dein Medizinstudium?**

[Bitte auswählen] ▼

**In welchem Bundesland studierst du?**

[Bitte auswählen] ▼

### Was ist dir in deinem späteren Arbeitsleben besonders wichtig?

[illegible]



Die Lebenserwartung in Deutschland ist in den letzten 120 Jahren deutlich gestiegen. Welche Rolle spielen hierfür deiner Meinung nach die nachfolgenden Maßnahmen?

Bitte bewerte die Maßnahmen nach deiner Präferenz, wobei „1“ der höchsten Präferenz entspricht und „6“ der niedrigsten Präferenz.

|                                                                                                       |                                                                      |                                                                                                                                                   |
|-------------------------------------------------------------------------------------------------------|----------------------------------------------------------------------|---------------------------------------------------------------------------------------------------------------------------------------------------|
| Medizinische Therapie kranker Menschen oder Krankheitsvorsorge bei nicht-übertragbaren Erkrankungen ⓘ | Medizinische Primärprävention ⓘ                                      | <b>1 – Höchste Relevanz</b><br><br><b>2</b><br><br><b>3</b><br><br><b>4</b><br><br><b>5</b><br><br><b>6 – Niedrigste Relevanz</b><br><br><b>7</b> |
| Nicht-medizinische Maßnahmen der Prävention und Gesundheitsförderung ⓘ                                | Medizinische Sekundärprävention ⓘ                                    |                                                                                                                                                   |
| Medizinische Therapie von Infektionskrankheiten ⓘ                                                     | Veränderung von Lebenswelten ⓘ                                       |                                                                                                                                                   |
|                                                                                                       | Armutsreduktion, Reduktion von Mangelernährung und weitere Maßnahmen |                                                                                                                                                   |
|                                                                                                       |                                                                      |                                                                                                                                                   |
|                                                                                                       |                                                                      |                                                                                                                                                   |
|                                                                                                       |                                                                      |                                                                                                                                                   |

Kommen die nachfolgenden Berufsfelder für dich nach deinem Studium in Frage?

|                                                            | Nein, auf keinen Fall | Nein, eher nicht      | Ja, wahrscheinlich    | Ja, auf jeden Fall    | keine Angabe          |
|------------------------------------------------------------|-----------------------|-----------------------|-----------------------|-----------------------|-----------------------|
| Ausbruchs- und Krisenmanagement ⓘ                          | <input type="radio"/> |
| (Medizinische) Primärprävention ⓘ und Sekundärprävention ⓘ | <input type="radio"/> |
| Verhaltensprävention ⓘ und Verhältnisprävention ⓘ          | <input type="radio"/> |
| Gesundheits- und Infektionsschutz ⓘ                        | <input type="radio"/> |
| Gesundheitshilfen für vulnerable Personengruppen ⓘ         | <input type="radio"/> |
| Gesundheitsplanung und Politikberatung ⓘ                   | <input type="radio"/> |

Wie intensiv werden bzw. wurden die nachfolgenden Aspekte während deines Hauptstudiums thematisiert?

|                                                                                                                                                                                                                               | nie                   | selten                | manch-<br>mal         | oft                   | sehr<br>oft           | bislang<br>noch<br>nicht |
|-------------------------------------------------------------------------------------------------------------------------------------------------------------------------------------------------------------------------------|-----------------------|-----------------------|-----------------------|-----------------------|-----------------------|--------------------------|
| Ausbruchs- und Krisenmanagement                                                                                                              | <input type="radio"/>    |
| (Medizinische) Primärprävention  und<br>Sekundärprävention  | <input type="radio"/>    |
| Verhaltensprävention  und<br>Verhältnisprävention           | <input type="radio"/>    |
| Gesundheits- und Infektionsschutz                                                                                                            | <input type="radio"/>    |
| Gesundheitshilfen für vulnerable<br>Personengruppen                                                                                          | <input type="radio"/>    |
| Gesundheitsplanung und Politikberatung                                                                                                       | <input type="radio"/>    |

Der Öffentliche Gesundheitsdienst (ÖGD) stellt neben der ambulanten und stationären Versorgung die dritte Säule des deutschen Gesundheitswesens dar. Er ist dabei für bevölkerungsmedizinische Fragestellungen verantwortlich.

Welche der eben genannten Tätigkeitsfelder gehören deiner Meinung nach in den Aufgabenbereich des Öffentlichen Gesundheitsdienstes (ÖGD)?

|                                                                                                                                                                                                                                   | Tätigkeit ist<br>eine Kern-<br>aufgabe<br>des ÖGD | Tätigkeit<br>gehört in<br>den<br>engeren<br>Aufgaben-<br>bereich des<br>ÖGD | Tätigkeit<br>gehört in<br>den<br>weiteren<br>Aufgaben-<br>bereich des<br>ÖGD | Tätigkeit<br>gehört nicht<br>zu dem<br>Aufgaben-<br>bereich des<br>ÖGD | keine<br>Angabe       |
|-----------------------------------------------------------------------------------------------------------------------------------------------------------------------------------------------------------------------------------|---------------------------------------------------|-----------------------------------------------------------------------------|------------------------------------------------------------------------------|------------------------------------------------------------------------|-----------------------|
| Ausbruchs- und Krisenmanagement                                                                                                                | <input type="radio"/>                             | <input type="radio"/>                                                       | <input type="radio"/>                                                        | <input type="radio"/>                                                  | <input type="radio"/> |
| (Medizinische) Primärprävention  und Sekundärprävention<br> | <input type="radio"/>                             | <input type="radio"/>                                                       | <input type="radio"/>                                                        | <input type="radio"/>                                                  | <input type="radio"/> |
| Verhaltensprävention  und Verhältnisprävention              | <input type="radio"/>                             | <input type="radio"/>                                                       | <input type="radio"/>                                                        | <input type="radio"/>                                                  | <input type="radio"/> |
| Gesundheits- und Infektionsschutz                                                                                                              | <input type="radio"/>                             | <input type="radio"/>                                                       | <input type="radio"/>                                                        | <input type="radio"/>                                                  | <input type="radio"/> |
| Gesundheitshilfen für vulnerable Personengruppen                                                                                               | <input type="radio"/>                             | <input type="radio"/>                                                       | <input type="radio"/>                                                        | <input type="radio"/>                                                  | <input type="radio"/> |
| Gesundheitsplanung und Politikberatung                                                                                                         | <input type="radio"/>                             | <input type="radio"/>                                                       | <input type="radio"/>                                                        | <input type="radio"/>                                                  | <input type="radio"/> |



## Inwiefern stimmst du den nachfolgenden Aussagen zu?

|                                                                                                                        | Ja                    | eher Ja               | eher Nein             | Nein                  | weiß nicht            |
|------------------------------------------------------------------------------------------------------------------------|-----------------------|-----------------------|-----------------------|-----------------------|-----------------------|
| Ich weiß, dass es eine Facharztweiterbildung für Öffentliches Gesundheitswesen gibt                                    | <input type="radio"/> |
| Ich kann mir vorstellen, im öffentlichen Gesundheitsdienst zu arbeiten                                                 | <input type="radio"/> |
| Ich kann mir vorstellen, in einem kommunalen Gesundheitsamt zu arbeiten                                                | <input type="radio"/> |
| Ich kann mir vorstellen, in einer Gesundheitsbehörde zu arbeiten (z.B. Ministerien, Landesgesundheitsämter, BZgA, RKI) | <input type="radio"/> |

## Kannst du dir vorstellen einen Studienabschnitt im öffentlichen Gesundheitsdienst zu absolvieren?

Mehrfachantworten sind möglich

- ☐ Ja, im Rahmen eines Wahlfaches  
☐ Ja, im Rahmen einer Famulatur  
☐ Ja, im Rahmen eines PJ-Tertials  
☐ Nein

☐ weiß nicht

## Nenne drei Adjektive, die du mit dem ÖGD assoziiertest

☐   
☐   
☐

☐ Ich kenne den ÖGD nicht

### Welche der nachfolgenden Charakteristika assoziiert du mit dem ÖGD?

Die Tätigkeiten im ÖGD sind ...

|                                                                              |                                                                                                               |                                                                        |
|------------------------------------------------------------------------------|---------------------------------------------------------------------------------------------------------------|------------------------------------------------------------------------|
| langweilig und eintönig                                                      | <input type="radio"/> <input type="radio"/> <input type="radio"/> <input type="radio"/> <input type="radio"/> | interessant und abwechslungsreich                                      |
| wenig fordernd und fachlich anspruchslos                                     | <input type="radio"/> <input type="radio"/> <input type="radio"/> <input type="radio"/> <input type="radio"/> | herausfordernd und fachlich anspruchsvoll                              |
| mit weitreichenden Auswirkungen auf die Gesundheit der Bevölkerung verbunden | <input type="radio"/> <input type="radio"/> <input type="radio"/> <input type="radio"/> <input type="radio"/> | mit geringen Auswirkungen auf die Gesundheit der Bevölkerung verbunden |
| mit globalen Gesundheitsproblemen verbunden                                  | <input type="radio"/> <input type="radio"/> <input type="radio"/> <input type="radio"/> <input type="radio"/> | mit lokalen Gesundheitsproblemen verbunden                             |
| modern und innovativ                                                         | <input type="radio"/> <input type="radio"/> <input type="radio"/> <input type="radio"/> <input type="radio"/> | traditionell und veraltet                                              |
| bürokratisch                                                                 | <input type="radio"/> <input type="radio"/> <input type="radio"/> <input type="radio"/> <input type="radio"/> | unbürokratisch                                                         |
| mit wenigen Aufstiegschancen verbunden                                       | <input type="radio"/> <input type="radio"/> <input type="radio"/> <input type="radio"/> <input type="radio"/> | mit vielen Aufstiegschancen verbunden                                  |
| für Personen mit Zielen und Ambitionen                                       | <input type="radio"/> <input type="radio"/> <input type="radio"/> <input type="radio"/> <input type="radio"/> | für Personen, die einen entspannten Job suchen                         |

### Der ÖGD wäre für mich ein attraktiver Arbeitgeber...

- ☐ Ja, weil
- ☐ Nein, weil

**Was müsste geschehen, damit der ÖGD für dich ein attraktiver Arbeitgeber wird?**

**Möchtest du uns zum Schluss noch etwas mitteilen?**

## Vielen Dank für deine Teilnahme!

Wir werden versuchen aus den Ergebnissen abzuleiten, welche Weichenstellungen vorgenommen werden müssen um attraktive Jobs und Arbeitsbedingungen zu schaffen. Durch eine Vielzahl an Antworten erhoffen wir uns (politische) Einflussmöglichkeiten, diese Wünsche und Erwartungen auch in deinem und unserem Sinne bei den Arbeitgebern durchzusetzen.

Wenn du die Ergebnisse nutzen möchtest, um dir an deiner Uni oder deinem (zukünftigen) Arbeitsplatz mehr Gehör zu verschaffen, oder wenn du auch nur allgemein daran interessiert bist, halten wir dich gerne über die Ergebnisse der Umfrage auf dem Laufenden.

Als Dankeschön für dein Engagement verlosen wir unter allen Teilnehmenden ein Kongressticket inkl. Übernachtungskosten zum nächsten [BVÖGD-Kongress](#) in Saarbrücken (23. – 25. April 2020), ein Lenovo-Tablet und drei Power-Banks.

- ☐ Ich will am **Gewinnspiel** teilnehmen. Ich willige ein, dass meine E-Mail-Adresse bis zur Ziehung der Gewinner gespeichert wird. Diese Einwilligung kann ich jederzeit widerrufen. Meine Angaben in dieser Befragung bleiben weiterhin anonym, meine E-Mail-Adresse wird nicht an Dritte weitergegeben.
- ☐ Ich interessiere mich für die **Ergebnisse dieser Studie** und hätte gerne eine Zusammenfassung per E-Mail.

## Vielen Dank für deine Unterstützung!

*Diese Umfrage ist eine Kooperation zwischen der Akademie für Öffentliches Gesundheitswesen (AfÖG), dem Bundesverband der Ärztinnen und Ärzte des öffentlichen Gesundheitsdienstes (BVÖGD), der Bundesvertretung der Medizinstudierenden in Deutschland e.V. (bvmd) und dem Nachwuchsnetzwerk Öffentliche Gesundheit (NÖG)*

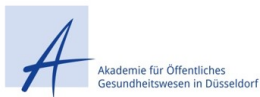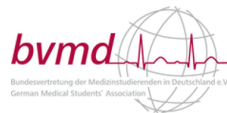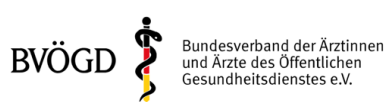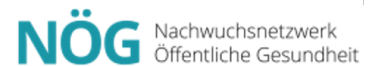

[Hier](#) geht es zur Auflösung der Public Health-Fragen.

Deine Antworten wurden gespeichert, du kannst das Browser-Fenster nun schließen.

---

### **Möchten Sie in Zukunft an interessanten und spannenden Online-Befragungen teilnehmen?**

Wir würden uns sehr freuen, wenn Sie Ihre E-Mail-Adresse für das SoSci Panel anmelden und damit wissenschaftliche Forschungsprojekte unterstützen.

E-Mail:

Am Panel teilnehmen

Die Teilnahme am SoSci Panel ist freiwillig, unverbindlich und kann jederzeit widerrufen werden.

Das SoSci Panel speichert Ihre E-Mail-Adresse nicht ohne Ihr Einverständnis, sendet Ihnen keine Werbung und gibt Ihre E-Mail-Adresse nicht an Dritte weiter.

Sie können das Browserfenster selbstverständlich auch schließen, ohne am SoSci Panel teilzunehmen.
